# 1 Benchmarking *de novo* assembly methods on 2 metagenomic sequencing data

3 Zhenmiao Zhang<sup>1</sup>, Chao Yang<sup>1</sup>, Xiaodong Fang<sup>2,3</sup>, and Lu Zhang<sup>1,\*</sup>

4 <sup>1</sup>Department of Computer Science, Hong Kong Baptist University, Hong Kong, China

5 <sup>2</sup>BGI-Shenzhen, Shenzhen, China

6 <sup>3</sup>China National GeneBank, BGI-Shenzhen, Shenzhen, China

7 \*ericluzhang@comp.hkbu.edu.hk

## 8 ABSTRACT

9 Metagenome assembly is an efficient approach to deciphering the "microbial dark matter" in the microbiota based on metagenomic sequencing, due to the technical challenges involved in isolating and culturing all microbes in vitro. Although short-read sequencing has been widely used for metagenome assembly, linked- and long-read sequencing have shown their advancements by providing long-range DNA connectedness in assembly. Many metagenome assembly tools use dedicated algorithms to simplify the assembly graphs and resolve the repetitive sequences in microbial genomes. However, there remains no comprehensive evaluation of the pros and cons of various metagenomic sequencing technologies in metagenome assembly, and there is a lack of practical guidance on selecting the appropriate metagenome assembly tools. Therefore, this paper presents a comprehensive benchmark of 15 *de novo* assembly tools applied to 32 metagenomic sequencing datasets obtained from simulation, mock communities, or human stool samples. These datasets were generated using mainstream sequencing platforms, such as Illumina and BGISEQ short-read sequencing, 10x Genomics linked-read sequencing, and PacBio and Oxford Nanopore long-read sequencing. The assembly tools were extensively evaluated against many criteria, which revealed that compared with the other sequencing technologies, long-read assemblers generated the highest contig continuity but failed to reveal some medium- and high-quality metagenome-assembled genomes (MAGs). In addition, hybrid assemblers using both short- and long-read sequencing were promising tools to both improve contig continuity and increase the number of near-complete MAGs. This paper also discussed the running time and peak memory consumption of these tools and provided practical guidance on selecting them.

## 10 Introduction

11 During long-term and complex genetic evolution, human and non-human animals have formed an ecosystem of symbiotic relationships with diverse microbes. Identifying these microbes and their genome sequences is essential for revealing their interactions with the hosts and providing rich information about human health and diseases<sup>1-3</sup>. The traditional identification strategy isolates and cultures the target microbes in vitro, and then each microbe's genome is sequenced<sup>4</sup>. However, most microbes in some specific conditions, e.g. human gastrointestinal tract<sup>5,6</sup>, cannot be cultured in the laboratory, which prevents the complete deciphering of the microbial community<sup>7</sup>. Alternatively, metagenomic sequencing enables the efficient, direct sequencing of a mixture of microbial DNAs without the need for microbial isolation, and thus facilitates the deciphering of microbial genomes with diverse characteristics. The metagenomic sequencing data is then subjected to metagenome assembly, which aims to reconstruct microbial genomes by concatenating the sequencing reads into long genome fragments (contigs). Metagenome assembly has been proven to be an effective strategy to explore microbial genomes and their biological functions from metagenomic sequencing data<sup>8</sup>.

12 Short-read sequencing is the most prevalent technology adopted in metagenomic studies. Many tools have been developed to assemble short-reads from the microbial genomes with imbalanced coverage and to distinguish the origins of reads based on their sequence characteristics. For example, Meta-IDBA<sup>9</sup> partitions *de Bruijn* graphs into isolated graph components based on their sequence similarities, with each graph component representing a unique species, and then uses each component's consensus sequences to form a draft genome. IDBA-UD<sup>10</sup> resolves short repeats from low-depth regions by local assembly using the paired-end constraint of short-reads. metaSPAdes<sup>11</sup> extends SPAdes<sup>12</sup> by incorporating a series of graph simplification strategies to separate strains with similar sequences, and applies ExSPAnDer<sup>13</sup> to detangle the repetitive sequences. MEGAHIT<sup>14</sup> constructs succinct *de Bruijn* graphs using *k*-mers (subsequences of length *k*) with various *k* to fill the gaps in low-depth regions and resolve genomic repeats. Currently, the most widely used commercial short-read sequencing platforms are designed by Illumina (e.g., HiSeq, NextSeq, and MiSeq) and BGI (e.g. BGISEQ-500, MGISEQ-200 and MGISEQ-2000), which provide read lengths between 100 bp and 300 bp<sup>15</sup>. The following three tasks in metagenome assembly cannot be easily achieved

33 using short read lengths, as long-range genomic connectedness cannot be determined: (1) the detection of horizontal gene  
34 transfers and transposon mobilization between species; (2) the deconvolution of duplicate and conserved sequences in microbial  
35 genomes; and (3) the generation of high-quality draft genomes for low-abundance species. As such, the advanced sequencing  
36 technologies, such as linked- and long-read sequencing, combine long-range DNA connectedness with sequencing reads and are  
37 advantageous for resolving complex genomic regions and generating more complete draft genomes than short-read sequencing.

38 Linked-read sequencing technology attaches short-reads with the same barcodes if they are derived from the same long  
39 DNA fragment; therefore, a barcode may include several "virtual" long-reads. Several linked-read sequencing platforms have  
40 been developed, such as Illumina TrueSeq Synthetic Long-Reads (SLR), LoopSeq, 10x Genomics (10x), single-tube Long  
41 Fragment Read (stLFR), and Transposase Enzyme-Linked Long-read Sequencing (TELL-Seq) and some of them have been  
42 used effectively for metagenome assembly, especially for the linked-reads from 10x platform. For example, Zlitni et al. explored  
43 temporal strain-level variants in stool samples from a patient during his 2-month hematopoietic cell transplant treatment, by  
44 assembling 10x metagenomic sequencing data<sup>16</sup>. Roodgar et al. investigated the responses of human gut microbiome during  
45 antibiotic treatment using longitudinal 10x linked-read sequencing and assembly<sup>17</sup>. Two assemblers have been developed for  
46 10x linked-read sequencing data. cloudSPAdes<sup>18</sup> models linked-read metagenome assembly as a shortest cloud superstring  
47 problem and leverages the reconstructed fragments to simplify the assembly graph. Bishara et al. developed Athena<sup>19</sup> to  
48 improve metagenome assembly by considering co-barcoded reads for local assembly and demonstrated that 10x linked-reads  
49 outperformed Illumina short-reads and SLR in the assembly of metagenomic data from human stool samples.

50 Long-read sequencing technology has recently received increasing attention. Single-molecule long-read sequencing  
51 platforms, such as the PacBio Single-Molecule Continuous Long Read sequencing (PacBio CLR), the PacBio highly accurate  
52 long-read sequencing (PacBio HiFi), and the Oxford Nanopore Technologies sequencing (ONT), have been used to assemble  
53 the genomes of many isolated microbes. Chin et al. implemented an assembly tool based on a hierarchical and greedy strategy  
54 and demonstrated its ability to assemble the complete genome of *Escherichia coli* K-12 from the deeply sequenced PacBio  
55 CLR data<sup>20</sup>. A follow-up study showed that Nanocorrect and Nanopolish exhibited comparable performance in *E. coli* genome  
56 assembly from polished ONT long-reads<sup>21</sup>. Accordingly, as mentioned, long-read sequencing has recently been applied to  
57 metagenome assembly. Tsai et al. used PacBio CLR long-reads to assemble the metagenomic sequencing data of human  
58 skin, and thereby identified a previously uncharacterized *Corynebacterium simulans*<sup>22</sup>. Another recent study investigated  
59 2,267 bacteria and archaea and found that a majority of their genomes could be assembled perfectly using PacBio CLR  
60 long-reads<sup>23</sup>. Many software have been developed for long-read metagenome assembly. metaFlye<sup>24</sup> extends Flye<sup>25</sup> to deal with  
61 uneven bacterial composition and intra-species heterogeneity by leveraging unique paths in repeat graphs. Canu<sup>26</sup> improves  
62 Celera<sup>27,28</sup> to deal with noisy long-reads by using multiple rounds of reads error-correction. Moss et al. improved the long-read  
63 sequencing protocol of DNA extraction and developed Lathe to optimize metagenome assembly on ONT data<sup>29</sup>. Several other  
64 state-of-the-art long-read assemblers have been released recently, including MECAT2<sup>30</sup>, NECAT<sup>31</sup>, Shasta<sup>32</sup>, and wtdbg2<sup>33</sup>,  
65 but few of them have been tested on metagenome assembly. Nevertheless, there are some limitations to long-read sequencing  
66 that restrict its practical application in metagenome assembly. First, the high base-error rate of long-read sequencing makes  
67 it challenging to distinguish strains and substrains with similar sequence characteristics. Second, the high cost of long-read  
68 sequencing prevents its wide application in large cohort studies.

69 Hybrid assembly is an alternative strategy that combines the strengths of both short-reads and long-reads. For example,  
70 the hybrid assembly tool DBG2OLC<sup>34</sup> aligns the contigs assembled from short-reads to long-reads, in which the identifiers  
71 of aligned contigs are used to represent each long-read. The overlap-layout-consensus approach is then performed on the  
72 long-reads by matching their contig identifiers. metaFlye has a hybrid assembly module ("--subassemblies") that considers  
73 the contigs assembled from both short- and long-reads as high-quality long fragments. OPERA-LG<sup>35</sup> links and orientates the  
74 contigs from short-read assembly by paired-end constraint and long-reads support. OPERA-MS<sup>36</sup> constructs a scaffold graph  
75 by linking the contigs assembled from short-reads if they are supported by long-reads. The contigs are grouped into clusters  
76 based on graph topology and read depths, with each cluster representing one species. Then, by leveraging reference genomes,  
77 OPERA-MS recognizes contigs derived from the same microbial strain, and OPERA-LG assembles these contigs.

78 Currently, the advantages and limitations of existing sequencing platforms and corresponding assembly tools remain  
79 unclear, and there is an urgent need for practical guidelines on how to select the best platform and tool for specific purposes.  
80 Szyrba et al. evaluated several short-read assemblers using the Critical Assessment of Metagenome Interpretation (CAMI)<sup>37</sup>;  
81 Meyer et al. added long-read assemblers using CAMI II datasets in a follow-up study<sup>38</sup>. Latorre-Pérez et al. benchmarked  
82 long-read assemblers using ONT data from ZymoBIOMICSTM Microbial Communities<sup>39</sup>. The assembly tools they evaluated  
83 were incomplete and one-sided, and these studies used datasets from simulation or mock communities, which could not fully  
84 represent real microbial communities.

85 In this study, we benchmarked 15 state-of-the-art tools to generate short-read, linked-read, long-read, and hybrid assemblies  
86 using metagenomic sequencing datasets from simulation, mock communities, and human stool samples (Fig. 1). This benchmark  
87 involved comparing the basic contig statistics, including total assembly length (*AL* for human stool datasets), genome fraction

88 (*GF* for simulation and mock datasets), and contig N50, NA50, and normalized NGA50 (**Methods**). We also evaluated  
89 the metagenome-assembled genomes (MAGs) after contig binning with respect to their continuities (MAG N50), qualities  
90 (**Methods**; *#MQ*: the number of medium-quality MAGs; *#HQ*: the number of high-quality MAGs; *#NC*: the number of  
91 near-complete MAGs), and annotations (the number of MAGs that can be annotated into species). Our results showed that  
92 the short-read assemblers generated the lowest contig continuity and *#NC*. MEGAHIT outperformed metaSPAdes on deeper  
93 sequenced datasets (>100x), and metaSPAdes obtained better results than MEGAHIT on low-complexity datasets. The contig  
94 N50s of linked-read assemblies were higher than those of short-read assemblies but lower than those of long-read assemblies.  
95 Athena demonstrated a higher contig N50 than cloudSPAdes and generated the highest *#NC* among all of the assemblers for  
96 the metagenomic sequencing data from human stool samples. Long-read assemblers demonstrated the highest contig N50 but  
97 generated smaller *#MQ* and *#HQ* than short- and linked-read assemblers. metaFlye, Canu, and Lathe performed much better  
98 than the other long-read assemblers. metaFlye generated the highest *GF*s and *AL*s for both ONT and PacBio CLR datasets.  
99 Lathe produced a higher *#NC* than metaFlye and Canu using ONT data. Hybrid assemblies demonstrated comparable or lower  
100 contig N50s and generated higher *#HQ* and *#NC* than long-read assemblies. metaFlye-subassemblies (with “--subassemblies”)  
101 generated higher contig N50s and were more stable than the other hybrid assemblers.

## 102 Results

### 103 Metagenomic sequencing datasets from simulation, mock communities, and human stool samples

104 In this study, 32 datasets were collected and generated using three sequencing technologies (**Methods**; Table 1 and Fig. 1):  
105 short-read (Illumina HiSeq and BGISEQ-500), linked-read (10x Chromium), and long-read (PacBio CLR and ONT) sequencing  
106 datasets. These comprised the following datasets: (1) Simulation datasets: four CAMI communities with low (CAMI<sub>L</sub>), medium  
107 (CAMI<sub>M1</sub> and CAMI<sub>M2</sub>), and high (CAMI<sub>H</sub>) complexities consisting of available short-reads, simulated 10x linked-reads,  
108 and simulated ONT long-reads. We merged CAMI datasets with high complexity from five time points into CAMI<sub>H</sub> to avoid  
109 insufficient read depth. The 10x linked-reads and ONT long-reads were simulated for the four CAMI communities (**Methods**).  
110 (2) Mock datasets from two mock communities: ATCC-MSA-1003<sup>40</sup> (ATCC20, sequenced by Illumina HiSeq 2500, 10x  
111 Chromium, and PacBio CLR) and ZymoBIOMICSTM Microbial Community Standard II with log distribution<sup>41</sup> (ZYMO,  
112 sequenced by Illumina HiSeq 1500, ONT GridION, and ONT PromethION). (3) Real datasets: four stool samples from human  
113 gut microbiome, denoted S1 and S2 (sequenced by Illumina HiSeq 2500, BGISEQ-500, 10x Chromium, and PacBio CLR;  
114 Supplementary Figure 1), and P1 and P2<sup>19,29</sup> (sequenced by Illumina HiSeq 4000, 10x Chromium, and ONT).

### 115 Metagenome assembly on short-read sequencing

116 We compared the assembly performance of metaSPAdes and MEGAHIT, the two mainstream short-read assemblers, on Illumina  
117 short-read sequencing data. The contigs generated by these two tools had comparable *GF*s (Fig. 2 a-f) and *AL*s (Fig. 3 a-d) on  
118 all datasets but nevertheless exhibited unique characteristics on different datasets. MEGAHIT showed better performance on the  
119 datasets with deeper sequencing depth (>100X; Table 1), such as ZYMO (133X), P1 (383X), and P2 (776X). For these datasets,  
120 the contigs of MEGAHIT had substantially higher N50s than those of metaSPAdes by 205.90% (ZYMO; Fig. 2 f), 148.60%  
121 (P1; Fig. 3 c), and 130.35% (P2; Fig. 3 d), respectively. By breaking the contigs at misassemblies, NA50 of MEGAHIT was  
122 2.08 times higher than that of metaSPAdes on ZYMO (NA50: MEGAHIT = 167.51 kbp, metaSPAdes = 80.58 kbp; Fig. 2  
123 f; Supplementary Table 1). By comparing the contig continuities of known species in ZYMO, we found that MEGAHIT  
124 also obtained 1.33 times higher normalized NGA50 than metaSPAdes (Fig. 2 f; Supplementary Figure 2). We grouped the  
125 contigs from the real datasets into MAGs and classified them based on different qualities (**Methods**). MEGAHIT produced  
126 higher *#MQ* and *#HQ* on P1 and P2 (*#MQ* in P1 and P2: MEGAHIT = 21, metaSPAdes = 6; *#HQ* in P1 and P2: MEGAHIT  
127 = 4, metaSPAdes = 1; Fig. 4 i-j, m-n) and achieved significantly higher MAG N50s than metaSPAdes (Wilcoxon rank-sum  
128 test p-value: P1 = 2.79e-5, P2 = 2.36e-3; Fig. 4 l and p; Supplementary Figure 3-4; Supplementary Table 2; **Methods**). We  
129 annotated the MAGs into species with a rigorous quality control process (**Methods**). In P1 and P2, the MAGs from MEGAHIT  
130 were annotated to seven species, whereas those from metaSPAdes were annotated to only two species (Fig. 5 c-d). metaSPAdes  
131 obtained much better contig continuity than MEGAHIT from the low- and medium-complexity datasets that were not deeply  
132 sequenced (<100X), such as CAMI<sub>L</sub>, CAMI<sub>M1</sub>, CAMI<sub>M2</sub>, and ATCC20. Its contig N50s, NA50s, and normalized NGA50s  
133 were, on average, 1.62, 1.66 and 1.43 times higher than those of MEGAHIT, respectively (Fig. 2 a-c and e; Supplementary  
134 Figure 5-6).

135 By comparing the assemblies using the datasets from Illumina HiSeq 2500 and BGISEQ-500, we observed MEGAHIT and  
136 metaSPAdes showed a similar trend that the two platforms generated comparable contig contiguity, *#MQ*, *#HQ* (Supplementary  
137 Table 1), and numbers of annotated species on S1 and S2 (Supplementary Figure 7). Their MAGs could be annotated to  
138 unique species. For example on S1 (Supplementary Figure 7), *Sutterella faecalis* and *Ruminococcus bicirculans* were uniquely  
139 annotated from the metaSPAdes assemblies on Illumina HiSeq 2500 and BGISEQ-500, respectively.

## 140 Metagenome assembly on linked-read sequencing

141 We compared the assemblies generated by cloudSPAdes and Athena on 10x linked-read sequencing data, which revealed that  
142 cloudSPAdes generated higher *GFs* than Athena on the simulation datasets (127.69% on average; Fig. 2 g-j) and produced  
143 higher *ALs* on the real datasets (average *AL*: cloudSPAdes = 343.65 Mbp, Athena = 267.55 Mbp; Fig. 3 e-h; Supplementary  
144 Table 1). cloudSPAdes failed to assemble the ATCC20 linked-read dataset due to insufficient memory (>1TB RAM); similar  
145 trends of *GFs* on the ATCC20 dataset were also reported in a previous study<sup>18</sup>. In the assessments using simulation datasets,  
146 the contigs from Athena had higher N50s (250.55% on average), NA50s (261.32% on average), and normalized NGA50s  
147 (115.53% on average) than those from cloudSPAdes (Fig. 2 g-j; Supplementary Figure 5). Tolstoganov et al. also reported  
148 higher contig N50s and NA50s from Athena on ATCC20<sup>18</sup>. A similar trend was observed for the real datasets: contig N50s  
149 (average N50: Athena = 158.92 kbp, cloudSPAdes = 43.16 kbp; Fig. 3 e-h; Supplementary Table 1) and MAG N50s (Wilcoxon  
150 rank-sum test p-value: S1 = 2.04e-5, S2 = 3.05e-6, P1 = 4.86e-4, P2 = 5.01e-5; Fig. 4 d, h, l and p; Supplementary Figure 3-4  
151 and 8-9; Supplementary Table 2) from Athena were significantly higher than those from cloudSPAdes. Athena also generated  
152 substantially more *#NC* than cloudSPAdes from the real datasets (*#NC* in total: Athena = 38, cloudSPAdes = 5; Fig. 4 c,  
153 g, k, and o). A comparable number of species was annotated from the MAGs generated by the two assembly tools, and  
154 both tools identified unique species (Fig. 5 e-h). For example, Athena identified three unique species (*Roseburia intestinalis*,  
155 *Phascolarctobacterium faecium*, and *Desulfovibrio fairfieldensis*), while cloudSPAdes identified four unique species (*Sutterella*  
156 *faecalis*, *Bifidobacterium adolescentis*, *Flavonifractor plautii*, and a *Longibaculum sp.*) on the S1 dataset (Fig. 5 e).

## 157 Metagenome assembly on long-read sequencing

158 We compared the performances of seven long-read assembly tools using PacBio CLR and ONT data: Shasta, wtdbg2, MECAT2  
159 (PacBio CLR only), NECAT (ONT only), Canu, metaFlye, and Lathe. Canu, metaFlye, and Lathe generated assemblies with  
160 significantly higher *GFs* on the simulation and mock datasets (328.45 times on average; Supplementary Table 1) and the  
161 assemblies with much longer *ALs* on all of the real datasets (4.64 times on average; except wtdbg2; Supplementary Table  
162 1) than the other four tools (Shasta, wtdbg2, MECAT2, and NECAT). This may be because Shasta, wtdbg2, MECAT2, and  
163 NECAT were not designed for metagenome assembly and may preferentially generate long contigs derived from a single  
164 species. Therefore, we only included Canu, metaFlye, and Lathe in the subsequent analysis as they generated assemblies with  
165 reasonable lengths.

166 The contigs generated by metaFlye had higher *GFs* than those generated by Canu and Lathe on most of the simulation and  
167 mock datasets (1.44 times on average, except Canu on CAMI<sub>H</sub>; Fig. 2 l-q). metaFlye also generated the highest *ALs* on the real  
168 datasets (an average of 1.40 times greater than Canu and Lathe; Fig. 3 i-l). The contig continuities of metaFlye assemblies were  
169 better than those of the corresponding Lathe assemblies on most datasets sequenced by either PacBio CLR or ONT: metaFlye  
170 generated higher contig N50s (1.60 times), NA50s (1.27 times), and normalized NGA50s (79.39 times) than Lathe on CAMI<sub>H</sub>  
171 (Fig. 2 o; Supplementary Figure 5), and higher contig N50s (average contig N50 on S1, S2 and P1: metaFlye = 199.04 kbp,  
172 Lathe = 112.63 kbp; Fig. 3 i-k; Supplementary Table 1) and significantly higher MAG N50s (Wilcoxon rank-sum test p-value:  
173 S1 = 2.27e-4, S2 = 9.85e-4, P1 = 4.83e-2; Fig. 4 d, h and l; Supplementary Figure 3, 8-9; Supplementary Table 2) than Lathe on  
174 the real datasets (S1, S2, and P1).

175 Compared to the assemblies generated by metaFlye and Lathe, the assemblies generated by Canu had higher (or comparable)  
176 contig continuity on ONT data, but lower (or comparable) continuity on PacBio CLR data. Eight datasets were generated  
177 by ONT, including CAMI<sub>L</sub>, CAMI<sub>M1</sub>, CAMI<sub>M2</sub>, CAMI<sub>H</sub>, ZYMO (GridION and PromethION), P1, and P2. Canu generated  
178 assemblies with higher normalized NGA50s (4.77 times on average) than metaFlye on the four CAMI datasets and generated  
179 assemblies with higher contig N50s (16.40 times on average) and NA50s (8.89 times on average) than metaFlye on the GridION  
180 and PromethION datasets from ZYMO (Fig. 2 l-o and q; Supplementary Figure 5; Supplementary Table 1). Canu also generated  
181 assemblies with higher contig continuity than those generated by metaFlye and Lathe on P1 and P2 (average contig N50s on  
182 P1 and P2: Canu = 233.62 kbp, metaFlye = 189.79 kbp, Lathe = 102.91 kbp; Fig. 3 k-l; Supplementary Table 1). Regarding  
183 the datasets sequenced by PacBio CLR (ATCC20, S1, and S2), metaFlye and Lathe produced assemblies with substantially  
184 higher contig N50s (124.33% on average), NA50s (139.95% on average), and normalized NGA50s (149.04% on average) than  
185 Canu on ATCC20 (Fig. 2 p; Supplementary Figure 10); metaFlye produced assemblies with higher contig N50s (171.32% on  
186 average) and MAG N50s (Wilcoxon rank-sum test p-value: S1 = 7.45e-5, S2 = 3.77e-8) than Canu on S1 and S2 (Fig. 3 i-j;  
187 Fig. 4 d and h; Supplementary Figure 8-9; Supplementary Table 2).

188 We further evaluated the MAG qualities and annotations of the assemblies generated by these three tools. For the PacBio  
189 CLR datasets from S1 and S2, metaFlye and Canu generated comparable *#HQ* and *#NC*, which were much larger than those  
190 generated by Lathe (*#HQ*: metaFlye = 21, Canu = 20, Lathe = 11; *#NC*: metaFlye = 14, Canu = 16, Lathe = 9; Fig. 4 b-c, f-g).  
191 They also generated more MAGs that were annotated to species (metaFlye = 26, Canu = 22, Lathe = 12; Fig. 5 i-j). For the  
192 ONT datasets from P1 and P2, the opposite trend was observed in the MAG qualities (*#HQ*: Lathe = 5, Canu = 0, metaFlye =  
193 0; *#NC*: lathe = 5, metaFlye = 0, Canu = 0; Fig. 4 j-k, n-o) and annotated species (Lathe = 9, metaFlye = 4, Canu = 1; Fig. 5

194 k-l). As the core assembly algorithms of Lathe are the same as those of Canu and metaFlye, the above observations imply  
195 that parameter optimization and sequencing error-correction are vital for ONT data assembly. We also found that all the three  
196 assembly tools identified uniquely annotated species, e.g., metaFlye, Canu, and Lathe uniquely reported *Alistipes sp.* (S1),  
197 *Bacteroides uniformis* (S1), and *Dialister pneumosintes* (P1), respectively (Fig. 5 i and k).

## 198 Metagenome hybrid assembly on short- and long-read sequencing

199 We evaluated the performance of four hybrid assembly tools, namely, metaFlye-subassemblies (Methods), DBG2OLC, OPERA-  
200 LG, and OPERA-MS, on short- and long-read sequencing datasets. Compared with the other tools, metaFlye-subassemblies  
201 produced assemblies with significantly higher *GF* (167.16% on average; Fig. 2 v) on ATCC20 and significantly higher *AL* on P1  
202 (182.44% on average; Fig. 3 o) and P2 (160.87% on average; Fig. 3 p). The four hybrid assembly tools generated comparable  
203 *GFs* and *ALs* on all of the other datasets (Fig. 2 r-u and w; Fig. 3 m-n). metaFlye-subassemblies and DBG2OLC generated  
204 assemblies with substantially higher contig continuity than OPERA-MS and OPERA-LG on most datasets. For example,  
205 metaFlye-subassemblies produced assemblies with higher contig N50s (2.26 times on average), NA50s (2.61 times on average),  
206 and normalized NGA50s (4.92 times on average; Supplementary Figure 11-13) than OPERA-LG and OPERA-MS on ATCC20  
207 and ZYMO (Fig. 2 v-w). metaFlye-subassemblies also obtained assemblies with higher contig N50s (2.97 times on average;  
208 Fig. 3 m-p) and MAG N50s than OPERA-LG and OPERA-MS (the Wilcoxon rank-sum test p-values were S1: OPERA-LG =  
209 3.27e-5 and OPERA-MS = 1.65e-4; S2: OPERA-LG = 1.60e-4 and OPERA-MS = 1.05e-5; P1: OPERA-LG = 8.02e-7 and  
210 OPERA-MS = 9.90e-14; P2: OPERA-LG = 2.37e-3 and OPERA-MS = 1.79e-10; Fig. 4 d, h, l and p; Supplementary Figure  
211 3-4, 8-9; Supplementary Table 2) on all of the real datasets. Furthermore, metaFlye-subassemblies had higher contig N50s  
212 (27.99 times on average), NA50s (19.18 times on average), and normalized NGA50s (6.84 times on average) than DBG2OLC  
213 assemblies on the low-complexity mock datasets such as ATCC20 and ZYMO (Fig. 2 v-w; Supplementary Figure 11-13;  
214 Supplementary Table 1).

215 We observed inconsistent trends in the MAG qualities of hybrid assemblies from different sequencing platform combinations.  
216 OPERA-MS and OPERA-LG generated assemblies with higher *#HQ* than those generated by the other tools on S1 and S2 (*#HQ*:  
217 OPERA-MS = 36, OPERA-LG = 40, metaFlye-subassemblies = 18, DBG2OLC = 22; Fig. 4 b and f), which were sequenced  
218 by Illumina and PacBio CLR. OPERA-MS assemblies showed higher *#NC* values than those generated by OPERA-LG  
219 (OPERA-MS = 20, OPERA-LG = 0; Fig. 4 c and g) from these two samples. For P1 and P2 sequenced by Illumina and ONT,  
220 metaFlye-subassemblies obtained assemblies with higher *#HQ* and *#NC* than the other tools (*#HQ*: metaFlye-subassemblies =  
221 6, DBG2OLC = 1, OPERA-MS = 0, OPERA-LG = 4; *#NC*: metaFlye-subassemblies = 6, DBG2OLC = 1, OPERA-MS = 0,  
222 OPERA-LG = 1; Fig. 4 j-k, n-o). The four assembly tools identified comparable numbers of annotated species on S1 and S2  
223 (metaFlye-subassemblies = 20, DBG2OLC = 21, OPERA-MS = 20, OPERA-LG = 20; Fig. 5 m-n). metaFlye-subassemblies  
224 identified more annotated species than the other three tools on P1 and P2 (metaFlye-subassemblies = 14, DBG2OLC = 8,  
225 OPERA-MS = 1, OPERA-LG = 7; Fig. 5 o-p). The MAGs generated by various tools were also annotated to unique species,  
226 e.g., *R. intestinalis*, *Clostridioides difficile*, *Desulfovibrio fairfiendensis*, and *Butyricimonas faecalis* were uniquely identified  
227 from the assemblies of metaFlye-subassemblies, DBG2OLC, OPERA-MS, and OPERA-LG on S1 (Fig. 5 m).

## 228 Metagenome assembly on different sequencing strategies

229 We compared the best assembly statistics (e.g. *AL*, *GF*, *N50*, *#HQ*, and the number of annotated species; Fig. 6-7; Supplementary  
230 Table 3) of the four sequencing strategies discussed above: (1) short-read sequencing, (2) linked-read sequencing, (3) long-read  
231 sequencing, and (4) hybrid sequencing (short- and long-read sequencing). We observed the *GFs* and *ALs* of hybrid assemblies  
232 were higher than or comparable to those generated from short-read or long-read assemblies for all datasets (Fig. 6). The contig  
233 continuities of hybrid and linked-read assemblies were lower than or comparable with long-read assemblies, and significantly  
234 better than those from short-read assemblies (Fig. 6).

235 Nevertheless, linked-read assemblies had the highest *#MQ* (166), *#HQ* (70), *#NC* (38) and identified the highest number of  
236 annotated species (55) in all of the real datasets (Fig. 7; Supplementary Table 3). These values were much higher than those of  
237 the short-read assemblies (*#MQ* = 77, *#HQ* = 43, *#NC* = 4, number of annotated species = 21; Fig. 7; Supplementary Table 3),  
238 the long-read assemblies (*#MQ* = 64, *#HQ* = 26, *#NC* = 21, number of annotated species = 36; Fig. 7; Supplementary Table 3),  
239 and the hybrid assemblies (*#MQ* = 87, *#HQ* = 46, *#NC* = 26, number of annotated species = 38; Fig. 7; Supplementary Table  
240 3). Notably, the assembly generated from each type of sequencing strategy could identify unique species, implying that these  
241 assemblies were somewhat complementary; for example, *R. hominis*, *P. faecium*, *Alistipes onderdonkii*, and *R. intestinalis* were  
242 uniquely annotated by the short-read, linked-read, long-read, and hybrid assemblies on the S2 dataset, respectively (Fig. 7 b).

## 243 Evaluation of computational time and resources

244 We compared the running time (real time) and peak memory consumption (maximum resident set size [RSS]) of the assembly  
245 tools applied to the simulation datasets (Fig. 8). We found that metaSPAdes had a longer running time (1.92 times on average)  
246 and substantially larger memory usage (8.72 times on average) than MEGAHIT for short-read assembly. cloudSPAdes had a

247 significantly longer running time (5.80 times on average) and consumed higher peak memory (8.73 times on average) than  
248 Athena for linked-read assembly. Canu required more than 7 days to complete the metagenome assembly on any of the CAMI  
249 datasets, which was more than twice as long as the other long-read assembly tools (we excluded Canu in Fig. 8 because it  
250 exceeded our server wall-clock time). Of the other long-read assemblers, Lathe and metaFlye had the highest peak memory  
251 consumption (3.57 times on average) and the longest running time (5.82 times on average), respectively (except for CAMI<sub>H</sub>).  
252 Of the hybrid assembly tools, DBG2OLC (6.80 times slower than the other tools on average) and metaFlye-subassemblies  
253 (9.30 times faster than the other tools on average) were the slowest and fastest tools, respectively. OPERA-MS and OPERA-LG  
254 had substantially higher peak-memory consumption than metaFlye-subassemblies and DBG2OLC (2.58 times on average). In  
255 addition, the trends in the CPU times recorded for all of these assembly tools were the same as the trends in the real times  
256 (Supplementary Figure 14).

## 257 Discussion

258 Metagenome assembly is the most straightforward way to identify the "microbial dark matter" from the microbiota and is  
259 therefore a core analytical method. Many metagenome assembly tools have been developed to analyze the data from various  
260 sequencing technologies, but there lacks an independent, comprehensive, and up-to-date investigation of these tools. We  
261 benchmarked the performance of the 15 most widely used assemblers on simulation, mock, and real datasets with diverse  
262 complexities and provided practical guidance for tool selection.

263 Recent studies<sup>42-44</sup> have demonstrated the applicability of representing microbial genomes using MAGs generated from  
264 large short-read metagenomic sequencing cohorts. Nevertheless, the short-read assembly usually generates highly fragmented  
265 contigs and poor quality MAGs. By comparing MEGAHIT and metaSPAdes, we observed that MEGAHIT outperformed  
266 metaSPAdes in generating assemblies from deeply sequenced datasets (>100x), probably because MEGAHIT has an optimized  
267 data structure and algorithms to analyze large datasets. However, metaSPAdes performed better than MEGAHIT in generating  
268 assemblies from low-complexity datasets, which is consistent with the observations from a previous study<sup>38</sup>.

269 Linked-reads are short-reads that are labeled with barcodes to facilitate the linking of short-reads if they are derived from  
270 the same long DNA fragments. We found that linked-read assemblies had consistently better contig continuity than short-read  
271 assemblies but sometimes worse continuity than long-read assemblies. This is probably because linked-reads help to resolve the  
272 ambiguous branches and circles from repetitive sequences in assembly graphs<sup>18,19</sup>. However, linked-reads nevertheless fail to  
273 capture the tandem repeats and highly variable regions presented within long fragments. Furthermore, we observed that Athena  
274 generated assemblies containing contigs with higher continuity and higher #NC than those generated by cloudSPAdes, although  
275 cloudSPAdes generated more sequences. The #NCs from linked-read assemblies were higher than those from long-read  
276 assemblies, which may be attributable to the high read depth and the low base-error rate of linked-read sequencing.

277 Long-read assemblers can generate the most continuous contigs, but individual contigs usually do not represent circular  
278 microbial genomes and sometimes cannot be grouped into high-quality MAGs. This may be because (1) high-molecular-weight  
279 DNA cannot be easily extracted from some microbes<sup>19</sup>; (2) high sequencing costs prevent sufficient long-reads being obtained;  
280 and (3) error-prone long-reads result in low-quality MAGs. In this study, we compared the performances of seven state-of-the-art  
281 long-read assemblers and found that Canu, metaFlye, and Lathe performed substantially better than the other assemblers.  
282 metaFlye generated assemblies with the highest *GF* and *AL*, consistent with the observation of a previous study<sup>39</sup>. Lathe  
283 generated assemblies with significantly more #NC than metaFlye and Canu from the ONT datasets, suggesting that sequencing  
284 error-correction is an essential step to improve MAG quality generated from ONT long-reads.

285 Hybrid assembly has been proposed as a way to correct assembly errors from error-prone long-reads by adding short-reads  
286 with high base quality. In this study, the hybrid assemblies had comparable or lower contig continuity than those from  
287 long-read assemblers, but the former had higher #NC. This observation is in line with our expectations, as the short-reads were  
288 mainly used to reduce misassemblies rather than fill gaps between contigs. We also observed that the contig continuities from  
289 overlap-layout-consensus tools (metaFlye-subassemblies and DBG2OLC) were better than those generated by *de Bruijn* graph  
290 tools (OPERA-LG and OPERA-MS).

291 Reconstructing the genomes of low- (0.1%-1%) and ultra-low (<0.1%) abundance species is a challenging task<sup>45,46</sup>. We  
292 evaluated the performances of different assemblers in assembling the genomes of species with low- and ultra-low abundance in  
293 ATCC20 (Supplementary Table 4). Short-read assemblers were unable to assemble any genomes of low-abundance species  
294 (*GF*>50%; Supplementary Figure 6), whereas all of these species were identified by linked-read (Athena; Supplementary  
295 Table 4), long-read (metaFlye and Shasta; Supplementary Figure 10), and hybrid assemblers (metaFlye-subassemblies and  
296 DBG2OLC; Supplementary Figure 11). For the five low-abundance species in ATCC20, the long-read (metaFlye) and hybrid  
297 (metaFlye-subassemblies) assemblers generated higher contig continuity than Athena on the linked-reads (Supplementary  
298 Table 4). Only one (ATCC\_8482) of the five ultra-low abundance species was obtained by long-read (Lathe and metaFlye;  
299 Supplementary Figure 10) and hybrid (metaFlye-subassembly; Supplementary Figure 11) assemblers, suggesting that ultra-low  
300 abundance species are still difficult to be assembled even if long-reads have been adopted.

301 Recently, PacBio HiFi technology has shown its great success in deciphering microbial communities<sup>47</sup>. We also compared  
302 the long-read assemblers on the PacBio HiFi dataset from ATCC20. Similar to our findings for PacBio CLR, we observed  
303 that metaFlye, Lathe, and Canu generated substantially higher *GFs* than Shasta, wtdbg2 and MECAT2 (8.98 times on average,  
304 Supplementary Table 1). metaFlye and Lathe obtained significantly higher N50s (2.50 times on average), NA50s (2.06 times on  
305 average), and normalized NGA50s (1.37 times on average) than Canu (Supplementary Table 1, Supplementary Figure 15).  
306 We found that the long-read assemblers on PacBio HiFi and CLR sequencing platforms produced comparable *GFs*, N50s,  
307 NA50s, and normalized NGA50s (Supplementary Table 1). The misassemblies generated by Canu on PacBio CLR reads were  
308 substantially higher (2.17 times on average) than on PacBio HiFi reads (Supplementary Table 1).

309 In this study, we thoroughly investigated the pros and cons of the metagenome assembly tools using datasets generated by  
310 a range of sequencing technologies – short-read, long-read, linked-read, and hybrid sequencing – and we provide practical  
311 guidelines to assist end-users to select the best strategy for their purposes. We believe that our findings will be invaluable to the  
312 microbiome research community and will shed light on future genome-based microbiome-wide association studies.

## 313 Methods

### 314 Simulate linked-reads and ONT long-reads for CAMI datasets

315 We simulated 10x linked-reads and ONT long-reads using LRTK-SIM (v201912229)<sup>48</sup> and CAMISIM (v1.2-beta)<sup>49</sup> given  
316 the taxonomic composition in CAMI datasets. The simulated total nucleotides were the same as those of the available four  
317 short-read CAMI datasets.

### 318 Sample preparation and sequencing for S1 and S2

319 The S1 and S2 datasets were obtained from two subjects with a typical Chinese diet and who had not taken any antibiotics,  
320 probiotics, or prebiotics in the three months prior to the sample collection. Their stool samples were collected, aliquoted, and  
321 stored at -80°C until analysis. Total microbial DNA was extracted using the QIAamp DNA stool mini kit (Qiagen, Valencia,  
322 CA, USA) according to the manufacturer's protocol. For short-read sequencing, fecal microbial DNA of the two subjects was  
323 sequenced by paired-end sequencing with a coverage of more than 30 million reads per sample using Illumina HiSeq 2500  
324 (Illumina, CA, USA) and BGISEQ-500 (BGI, ShenZhen, China), respectively. For linked-read sequencing, we followed the  
325 strategies described by Bishara et al.<sup>19</sup> for library preparation on a 10x Chromium System (10x Genomics, CA, USA) and  
326 performed sequencing on an Illumina HiSeq 2500 (Illumina, CA, USA). For long-read sequencing, the SMRTbell libraries were  
327 prepared with the 20-kb Template Preparation using BluePippin™ Size selection system (15-kb size cutoff) protocol and were  
328 then sequenced in SMRT cells (Pacific Biosciences, CA, USA) with magnetic bead loading and P4-C2 or P6-C4 chemistry.

### 329 Metagenome assembly

330 We used MEGAHIT (v1.2.9)<sup>14</sup> and metaSPAdes (v3.15.0)<sup>11</sup> for short-read assembly; cloudSPAdes (v3.12.0-dev)<sup>18</sup> and Athena  
331 (v1.3)<sup>19</sup> for linked-read assembly; Shasta (v0.7.0)<sup>32</sup>, wtdbg2 (v2.5)<sup>33</sup>, MECAT2 (v20190314)<sup>30</sup>, NECAT (v0.01)<sup>31</sup>, metaFlye  
332 (v2.8.3)<sup>24</sup>, Canu (v2.1.1)<sup>26</sup>, and Lathe (v20210210)<sup>29</sup> for long-read assembly; and DBG2OLC (v20200724)<sup>34</sup>, and metaFlye  
333 (v2.8.3)<sup>24</sup>, OPERA-LG (v2.0.6)<sup>35</sup>, and OPERA-MS (v0.8.3)<sup>36</sup> for hybrid assembly. To enable the hybrid mode of metaFlye  
334 (metaFlye-subassemblies), we combined the contigs assembled from short-reads (metaSPAdes) and long-reads (metaFlye)  
335 using the "--subassemblies" option. We used "--pacbio-hifi" for metaFlye HiFi assembly<sup>47</sup>.

336 Most of the assembly tools were run using default parameters, but we adjusted the parameters in the following cases to avoid  
337 out of memory issues: (1) metaFlye on CAMI<sub>H</sub> was run with "flye --asm-coverage 50"; and (2) NECAT on CAMI<sub>H</sub> was run with  
338 "MIN\_READ\_LENGTH=8000". All commands are available at [https://github.com/ZhangZhenmiao/metagenome\\_assembly](https://github.com/ZhangZhenmiao/metagenome_assembly).  
339 The running times (user, system, and real times) and the maximum peak memory (RSS) consumptions of the assembly tools  
340 were retrieved using the Linux command "/usr/bin/time -v". All of the assembly tools were run on Linux machines with a dual  
341 64-core AMD EPYC 7742 2.25GHz base clock speed 256MB L3 cache CPU with 1 TB memory.

### 342 Contig statistics

343 We generated *AL*, contig N50, and MAG N50 by QUAST (v5.0.2)<sup>50</sup> after removing the contigs shorter than 1 kb. We enabled the  
344 MetaQUAST mode<sup>51</sup> to obtain contig NA50 and NGA50 for each species from the datasets for which reference genomes were  
345 available. We used the parameter "--fragmented --min-alignment 500 --unique-mapping" in MetaQUAST to disable ambiguous  
346 alignments. To compare NGA50s across different samples, we defined normalized NGA50 by averaging NGA50/genome size  
347 across all of the species in the sample.

### 348 Contig binning and MAG qualities

349 To prepare the inputs of MetaBat2<sup>52</sup> for contig binning, we used BWA (v0.7.17)<sup>53</sup> and minimap2 (v2.17)<sup>54</sup> to align short-reads  
350 (or linked-reads) and long-reads to the contigs, respectively. Minimap2 used the parameters "--ax map-pb" and "--ax map-ont" to

align PacBio CLR and ONT reads, respectively. For hybrid assembly, the short-read alignment was adopted as the input of MetaBat2. The alignment file was sorted by coordinates using SAMtools (v1.9)<sup>55</sup>, and the contig coverage was extracted by the "jgi\_summarize\_bam\_contig\_depths" program in MetaBat2. MetaBat2 (v2.12.1)<sup>52</sup> was used to group the contigs into MAGs using both contig coverage and sequence characteristics. We explored the single-copy gene completeness and contamination of each MAG using CheckM (v1.1.2)<sup>56</sup>. The transfer RNAs (tRNAs) and ribosomal RNAs (5S, 16S, and 23S rRNAs) were detected by ARAGORN (v1.2.38)<sup>57</sup> and barnap (v0.9)<sup>58</sup>, respectively. MAGs were defined as high-quality (completeness > 90%, contamination < 5%), medium-quality (completeness  $\geq$  50%, contamination < 10%), or low-quality (otherwise). Near-complete MAGs were those high-quality MAGs with 5S, 16S, and 23S rRNAs, and at least 18 tRNAs<sup>59</sup>.

### 359 Annotate MAGs into species

360 We removed poorly assembled MAGs with contig N50s < 50 kbp, completeness < 75%, or contamination > 25%, and  
361 annotated the contigs in MAGs with Kraken2 (v2.1.2)<sup>60</sup>. To determine the dominant species identified for each MAG, we used  
362 "assign\_species.py" from "metagenomics\_workflows"<sup>61</sup>, which has been adopted in previous studies<sup>19,29</sup>. dRep<sup>62</sup> was used to  
363 remove the redundant MAGs from the same species.

### 364 Data availability

365 The CAMI short-reads were downloaded from "1st CAMI Challenge Dataset 1 CAMI\_low", "1st CAMI Challenge Dataset 2  
366 CAMI\_medium" and "1st CAMI Challenge Dataset 3 CAMI\_high" of [CAMI challenge website](#). The other available datasets  
367 were downloaded from NCBI Sequence Read Archive (SRA). The Illumina HiSeq 2500 short-reads, 10x linked-reads and  
368 PacBio CLR long-reads of ATCC20 were available with the accession codes SRR8359173, SRR12283286 and SRR12371719,  
369 respectively. We also used the PacBio HiFi long-reads of ATCC20 from SRR9202034 and SRR9328980. The Illumina  
370 HiSeq 1500 short-reads, ONT GridION and ONT PromethION long-reads of ZYMO were collected from ERR2935805,  
371 ERR3152366 and ERR3152367, respectively. The Illumina HiSeq 4000 short-reads (P1: SRR6788327, SRR6807561; P2:  
372 SRR6788328, SRR6807555), 10x linked-reads (P1: SRR6760786 ; P2: SRR6760782) and ONT long-reads (P1: SRR8427258;  
373 P2: SRR8427257) of P1 and P2 were also downloaded from SRA. The Illumina HiSeq 2500 short-reads, 10x linked-reads, and  
374 long-reads of S1 and S2 are available in SRA (PRJNA841170).

### 375 Acknowledgements

376 The authors thank the Research Grants Council of Hong Kong, Hong Kong Baptist University, and HKBU Research Committee  
377 for their kind support of this project.

### 378 Funding

379 This research was partially supported by the Hong Kong Research Grant Council Early Career Scheme (HKBU 22201419),  
380 HKBU Start-up Grant Tier 2 (RC-SGT2/19-20/SCI/007), HKBU IRCMS (No. IRCMS/19-20/D02), and the Guangdong Basic  
381 and Applied Basic Research Foundation (No. 2019A1515011046 and No. 2021A1515012226). The design of the study and  
382 collection, analysis, and interpretation of data were partially supported by the Science Technology and Innovation Committee  
383 of Shenzhen Municipality, China (SGDX20190919142801722)

### 384 Author contributions statement

385 LZ conceived the study; ZMZ conducted the experiments and analyzed the results; ZMZ and LZ wrote the manuscript; CY  
386 reviewed the manuscript; and XDF helped with the library preparation and sequencing of S1 and S2. All of the authors have  
387 read and approved the final manuscript.

### 388 References

- 389 1. Korem, T. *et al.* Growth dynamics of gut microbiota in health and disease inferred from single metagenomic samples.  
390 *Science* **349**, 1101–1106 (2015).
- 391 2. Xu, P. & Gunsolley, J. Application of metagenomics in understanding oral health and disease. *Virulence* **5**, 424–432  
392 (2014).
- 393 3. Martín, R., Miquel, S., Langella, P. & Bermúdez-Humarán, L. G. The role of metagenomics in understanding the human  
394 microbiome in health and disease. *Virulence* **5**, 413–423 (2014).
- 395 4. Simon, C. & Daniel, R. Metagenomic analyses: past and future trends. *Appl. environmental microbiology* **77**, 1153–1161  
396 (2011).



- 397 **5.** Browne, H. P. *et al.* Culturing of ‘unculturable’ human microbiota reveals novel taxa and extensive sporulation. *Nature* **533**,  
398 543–546 (2016).
- 399 **6.** Forster, S. C. *et al.* A human gut bacterial genome and culture collection for improved metagenomic analyses. *Nat.*  
400 *biotechnology* **37**, 186–192 (2019).
- 401 **7.** Singh, B. K. Exploring microbial diversity for biotechnology: the way forward. *Trends biotechnology* **28**, 111–116 (2010).
- 402 **8.** Yang, C. *et al.* A review of computational tools for generating metagenome-assembled genomes from metagenomic  
403 sequencing data. *Comput. Struct. Biotechnol. J.* **19**, 6301–6314 (2021).
- 404 **9.** Peng, Y., Leung, H. C., Yiu, S.-M. & Chin, F. Y. Meta-ibba: a de novo assembler for metagenomic data. *Bioinformatics* **27**,  
405 i94–i101 (2011).
- 406 **10.** Peng, Y., Leung, H. C., Yiu, S.-M. & Chin, F. Y. Idba-ud: a de novo assembler for single-cell and metagenomic sequencing  
407 data with highly uneven depth. *Bioinformatics* **28**, 1420–1428 (2012).
- 408 **11.** Nurk, S., Meleshko, D., Korobeynikov, A. & Pevzner, P. A. metaspades: a new versatile metagenomic assembler. *Genome*  
409 *research* **27**, 824–834 (2017).
- 410 **12.** Bankevich, A. *et al.* Spades: a new genome assembly algorithm and its applications to single-cell sequencing. *J.*  
411 *computational biology* **19**, 455–477 (2012).
- 412 **13.** Prjibelski, A. D. *et al.* Exspander: a universal repeat resolver for dna fragment assembly. *Bioinformatics* **30**, i293–i301  
413 (2014).
- 414 **14.** Li, D., Liu, C.-M., Luo, R., Sadakane, K. & Lam, T.-W. Megahit: an ultra-fast single-node solution for large and complex  
415 metagenomics assembly via succinct de bruijn graph. *Bioinformatics* **31**, 1674–1676 (2015).
- 416 **15.** Besser, J., Carleton, H. A., Gerner-Smidt, P., Lindsey, R. L. & Trees, E. Next-generation sequencing technologies and their  
417 application to the study and control of bacterial infections. *Clin. microbiology infection* **24**, 335–341 (2018).
- 418 **16.** Zlitni, S. *et al.* Strain-resolved microbiome sequencing reveals mobile elements that drive bacterial competition on a  
419 clinical timescale. *Genome medicine* **12**, 1–17 (2020).
- 420 **17.** Roodgar, M. *et al.* Longitudinal linked-read sequencing reveals ecological and evolutionary responses of a human gut  
421 microbiome during antibiotic treatment. *Genome research* **31**, 1433–1446 (2021).
- 422 **18.** Tolstoganov, I., Bankevich, A., Chen, Z. & Pevzner, P. A. cloudspades: assembly of synthetic long reads using de bruijn  
423 graphs. *Bioinformatics* **35**, i61–i70 (2019).
- 424 **19.** Bishara, A. *et al.* High-quality genome sequences of uncultured microbes by assembly of read clouds. *Nat. biotechnology*  
425 **36**, 1067–1075 (2018).
- 426 **20.** Chin, C.-S. *et al.* Nonhybrid, finished microbial genome assemblies from long-read smrt sequencing data. *Nat. methods*  
427 **10**, 563–569 (2013).
- 428 **21.** Loman, N. J., Quick, J. & Simpson, J. T. A complete bacterial genome assembled de novo using only nanopore sequencing  
429 data. *Nat. methods* **12**, 733–735 (2015).
- 430 **22.** Tsai, Y.-C. *et al.* Resolving the complexity of human skin metagenomes using single-molecule sequencing. *MBio* **7**,  
431 e01948–15 (2016).
- 432 **23.** Koren, S. *et al.* Reducing assembly complexity of microbial genomes with single-molecule sequencing. *Genome biology*  
433 **14**, 1–16 (2013).
- 434 **24.** Kolmogorov, M. *et al.* metaflye: scalable long-read metagenome assembly using repeat graphs. *Nat. Methods* **17**,  
435 1103–1110 (2020).
- 436 **25.** Kolmogorov, M., Yuan, J., Lin, Y. & Pevzner, P. A. Assembly of long, error-prone reads using repeat graphs. *Nat.*  
437 *biotechnology* **37**, 540–546 (2019).
- 438 **26.** Koren, S. *et al.* Canu: scalable and accurate long-read assembly via adaptive k-mer weighting and repeat separation.  
439 *Genome research* **27**, 722–736 (2017).
- 440 **27.** Myers, E. W. *et al.* A whole-genome assembly of drosophila. *Science* **287**, 2196–2204 (2000).
- 441 **28.** Miller, J. R. *et al.* Aggressive assembly of pyrosequencing reads with mates. *Bioinformatics* **24**, 2818–2824 (2008).
- 442 **29.** Moss, E. L., Maghini, D. G. & Bhatt, A. S. Complete, closed bacterial genomes from microbiomes using nanopore  
443 sequencing. *Nat. biotechnology* **38**, 701–707 (2020).

- 444 **30.** Xiao, C.-L. *et al.* Mecat: fast mapping, error correction, and de novo assembly for single-molecule sequencing reads.  
445 *nature methods* **14**, 1072–1074 (2017).
- 446 **31.** Chen, Y. *et al.* Efficient assembly of nanopore reads via highly accurate and intact error correction. *Nat. Commun.* **12**,  
447 1–10 (2021).
- 448 **32.** Shafin, K. *et al.* Nanopore sequencing and the shasta toolkit enable efficient de novo assembly of eleven human genomes.  
449 *Nat. biotechnology* **38**, 1044–1053 (2020).
- 450 **33.** Ruan, J. & Li, H. Fast and accurate long-read assembly with wtdbg2. *Nat. methods* **17**, 155–158 (2020).
- 451 **34.** Ye, C., Hill, C. M., Wu, S., Ruan, J. & Ma, Z. S. Dbg2olc: efficient assembly of large genomes using long erroneous reads  
452 of the third generation sequencing technologies. *Sci. reports* **6**, 1–9 (2016).
- 453 **35.** Gao, S., Bertrand, D., Chia, B. K. & Nagarajan, N. Opera-lg: efficient and exact scaffolding of large, repeat-rich eukaryotic  
454 genomes with performance guarantees. *Genome biology* **17**, 1–16 (2016).
- 455 **36.** Bertrand, D. *et al.* Hybrid metagenomic assembly enables high-resolution analysis of resistance determinants and mobile  
456 elements in human microbiomes. *Nat. biotechnology* **37**, 937–944 (2019).
- 457 **37.** Sczyrba, A. *et al.* Critical assessment of metagenome interpretation—a benchmark of metagenomics software. *Nat.*  
458 *methods* **14**, 1063–1071 (2017).
- 459 **38.** Meyer, F. *et al.* Tutorial: assessing metagenomics software with the caml benchmarking toolkit. *Nat. protocols* **16**,  
460 1785–1801 (2021).
- 461 **39.** Latorre-Pérez, A., Villalba-Bermell, P., Pascual, J. & Vilanova, C. Assembly methods for nanopore-based metagenomic  
462 sequencing: a comparative study. *Sci. reports* **10**, 1–14 (2020).
- 463 **40.** ATCC-MSA-1003. <https://www.atcc.org/products/msa-1003>.
- 464 **41.** Nicholls, S. M., Quick, J. C., Tang, S. & Loman, N. J. Ultra-deep, long-read nanopore sequencing of mock microbial  
465 community standards. *Gigascience* **8**, giz043 (2019).
- 466 **42.** Parks, D. H. *et al.* Recovery of nearly 8,000 metagenome-assembled genomes substantially expands the tree of life. *Nat.*  
467 *microbiology* **2**, 1533–1542 (2017).
- 468 **43.** Almeida, A. *et al.* A new genomic blueprint of the human gut microbiota. *Nature* **568**, 499–504 (2019).
- 469 **44.** Almeida, A. *et al.* A unified catalog of 204,938 reference genomes from the human gut microbiome. *Nat. biotechnology*  
470 **39**, 105–114 (2021).
- 471 **45.** Cleary, B. *et al.* Detection of low-abundance bacterial strains in metagenomic datasets by eigengene partitioning. *Nat.*  
472 *biotechnology* **33**, 1053–1060 (2015).
- 473 **46.** Luo, Y., Yu, Y. W., Zeng, J., Berger, B. & Peng, J. Metagenomic binning through low-density hashing. *Bioinformatics* **35**,  
474 219–226 (2019).
- 475 **47.** Bickhart, D. M. *et al.* Generating lineage-resolved, complete metagenome-assembled genomes from complex microbial  
476 communities. *Nat. biotechnology* 1–9 (2022).
- 477 **48.** Zhang, L., Zhou, X., Weng, Z. & Sidow, A. Assessment of human diploid genome assembly with 10x linked-reads data.  
478 *Gigascience* **8**, giz141 (2019).
- 479 **49.** Fritz, A. *et al.* Camisim: simulating metagenomes and microbial communities. *Microbiome* **7**, 1–12 (2019).
- 480 **50.** Gurevich, A., Saveliev, V., Vyahhi, N. & Tesler, G. Quast: quality assessment tool for genome assemblies. *Bioinformatics*  
481 **29**, 1072–1075 (2013).
- 482 **51.** Mikheenko, A., Saveliev, V. & Gurevich, A. Metaquast: evaluation of metagenome assemblies. *Bioinformatics* **32**,  
483 1088–1090 (2016).
- 484 **52.** Kang, D. D. *et al.* Metabat 2: an adaptive binning algorithm for robust and efficient genome reconstruction from  
485 metagenome assemblies. *PeerJ* **7**, e7359 (2019).
- 486 **53.** Li, H. Aligning sequence reads, clone sequences and assembly contigs with bwa-mem. *arXiv preprint arXiv:1303.3997*  
487 (2013).
- 488 **54.** Li, H. Minimap2: pairwise alignment for nucleotide sequences. *Bioinformatics* **34**, 3094–3100 (2018).
- 489 **55.** Li, H. *et al.* The sequence alignment/map format and samtools. *Bioinformatics* **25**, 2078–2079 (2009).

- 490 **56.** Parks, D. H., Imelfort, M., Skennerton, C. T., Hugenholtz, P. & Tyson, G. W. Checkm: assessing the quality of microbial  
491 genomes recovered from isolates, single cells, and metagenomes. *Genome research* **25**, 1043–1055 (2015).
- 492 **57.** Laslett, D. & Canback, B. Aragorn, a program to detect trna genes and tmrna genes in nucleotide sequences. *Nucleic acids*  
493 *research* **32**, 11–16 (2004).
- 494 **58.** Seemann, T. barnap. <https://github.com/tseemann/barnap> (2018).
- 495 **59.** Bowers, R. M. *et al.* Minimum information about a single amplified genome (misag) and a metagenome-assembled genome  
496 (mimag) of bacteria and archaea. *Nat. biotechnology* **35**, 725–731 (2017).
- 497 **60.** Wood, D. E., Lu, J. & Langmead, B. Improved metagenomic analysis with kraken 2. *Genome biology* **20**, 1–13 (2019).
- 498 **61.** Moss, E. L. metagenomics\_workflows. [https://github.com/elimoss/metagenomics\\_workflows](https://github.com/elimoss/metagenomics_workflows) (2019).
- 499 **62.** Olm, M. R., Brown, C. T., Brooks, B. & Banfield, J. F. drep: a tool for fast and accurate genomic comparisons that enables  
500 improved genome recovery from metagenomes through de-replication. *The ISME journal* **11**, 2864–2868 (2017).

## 501 **Supplementary information**

502 **Supplementary Notes:** Supplementary Figure 1-15.

503 **Supplementary Figure 1:** Species composition and Shannon diversity of the S1 and S2 datasets obtained from different  
504 sequencing platforms.

505 **Supplementary Figure 2:** Contig continuities and genome fractions (*GF*) for the short-read assemblies on the ZYMO dataset.  
506 The red and green colors on the y-axis represent low- and ultra-low abundance species, respectively. The suffixes in the figure  
507 legend indicate the corresponding sequencing platforms.

508 **Supplementary Figure 3:** MAG N50s and coverage distribution for P1. The suffixes in the figure legend indicate the  
509 corresponding sequencing platforms. The green, blue, red, and black colors denote short-read, linked-read, long-read, and  
510 hybrid assembly tools, respectively.

511 **Supplementary Figure 4:** MAG N50s and coverage distribution for P2. The suffixes in the figure legend indicate the  
512 corresponding sequencing platforms. The green, blue, red, and black colors denote short-read, linked-read, long-read, and  
513 hybrid assembly tools, respectively.

514 **Supplementary Figure 5:** Distribution of normalized NGA50s for the species in the four CAMI datasets. The suffixes in  
515 the figure legend indicate the corresponding sequencing platforms. The green, blue, red, and black colors denote short-read,  
516 linked-read, long-read, and hybrid assembly tools, respectively.

517 **Supplementary Figure 6:** Contig continuities and genome fractions (*GF*) for the short-read assemblies on the ATCC20 dataset.  
518 The red and green colors on the y-axis represent low- and ultra-low abundance species, respectively. The suffixes in the figure  
519 legend indicate the corresponding sequencing platforms.

520 **Supplementary Figure 7:** The MAG annotations for S1 and S2 generated by BGISEQ-500 and Illumina HiSeq 2500.

521 **Supplementary Figure 8:** MAG N50s and coverage distribution for S1. The suffixes in the figure legend indicate the  
522 corresponding sequencing platforms. The green, blue, red, and black colors denote short-read, linked-read, long-read, and  
523 hybrid assembly tools, respectively.

524 **Supplementary Figure 9:** MAG N50s and coverage distribution for S2. The suffixes in the figure legend indicate the  
525 corresponding sequencing platforms. The green, blue, red, and black colors denote short-read, linked-read, long-read, and  
526 hybrid assembly tools, respectively.

527 **Supplementary Figure 10:** Contig continuities and genome fractions (*GF*) for the long-read assemblies on the PacBio CLR  
528 dataset of ATCC20. The red and green colors on the y-axis represent low- and ultra-low abundance species, respectively. The  
529 suffixes in the figure legend indicate the corresponding sequencing platforms.

530 **Supplementary Figure 11:** Contig continuities and genome fractions (*GF*) for the hybrid assemblies on the ATCC20 dataset.  
531 The red and green colors on the y-axis represent low- and ultra-low abundance species, respectively. The suffixes in the figure  
532 legend indicate the corresponding sequencing platforms.

533 **Supplementary Figure 12:** Contig continuities and genome fractions (*GF*) for the hybrid assemblies (Illumina + ONT  
534 GridION) on the ZYMO dataset. The red and green colors on the y-axis represent low- and ultra-low abundance species,  
535 respectively. The suffixes in the figure legend indicate the corresponding sequencing platforms.

536 **Supplementary Figure 13:** Contig continuities and genome fractions (*GF*) for the hybrid assemblies (Illumina + ONT  
537 PromethION) on the ZYMO dataset. The red and green colors on the y-axis represent low- and ultra-low abundance species,  
538 respectively. The suffixes in the figure legend indicate the corresponding sequencing platforms.

539 **Supplementary Figure 14:** CPU time consumed by the assembly tools in processing the CAMI datasets. We removed metaFlye  
540 and NECAT on CAMI<sub>H</sub> because they exceeded the maximum memory limitation.

541 **Supplementary Figure 15:** Contig continuities and genome fractions (*GF*) for the long-read assemblies on the PacBio HiFi

542 dataset of ATCC20. The red and green colors on the y-axis represent low- and ultra-low abundance species, respectively. The  
 543 suffixes in the figure legend indicate the corresponding sequencing platforms.

544 **Supplementary Table 1:** QUASt report of the assembly results generated from all of the datasets, and the #MQ, #HQ, and  
 545 #NC for the real datasets.

546 **Supplementary Table 2:** The p-values (Wilcoxon rank-sum tests) of MAG N50s generated by different assembly tools on the  
 547 real datasets.

548 **Supplementary Table 3:** The best assembly statistics of the assemblies from different sequencing technologies.

549 **Supplementary Table 4:** NGA50s for the low- and ultra-low abundance species from the ATCC20 dataset.

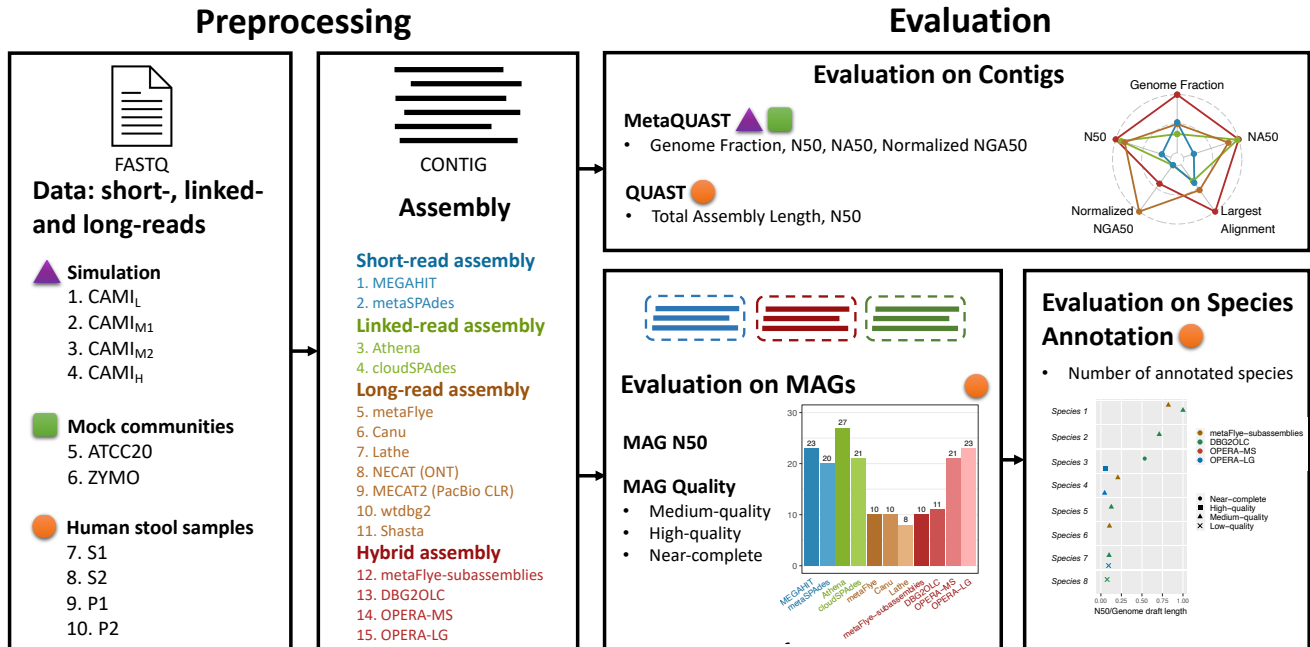

**Figure 1.** Data and workflow used to benchmark 15 metagenome assembly tools. **Preprocessing:** We collected 32 datasets generated by short-read, linked-read, and long-read sequencing from simulation, mock communities and four human stool samples, which were used to evaluate the performances of 15 de novo assembly tools. **Evaluation:** The following contig statistics were used to evaluate the assemblies: total assembly length (*AL*), genome fraction (*GF*), contig N50, NA50, and normalized NGA50. The assemblies generated from the real datasets were evaluated by metagenome-assembled genome (MAG) N50s; the numbers of medium-quality (#MQ), high-quality (#HQ), and near-complete (#NC) MAGs; and the numbers of annotated species.

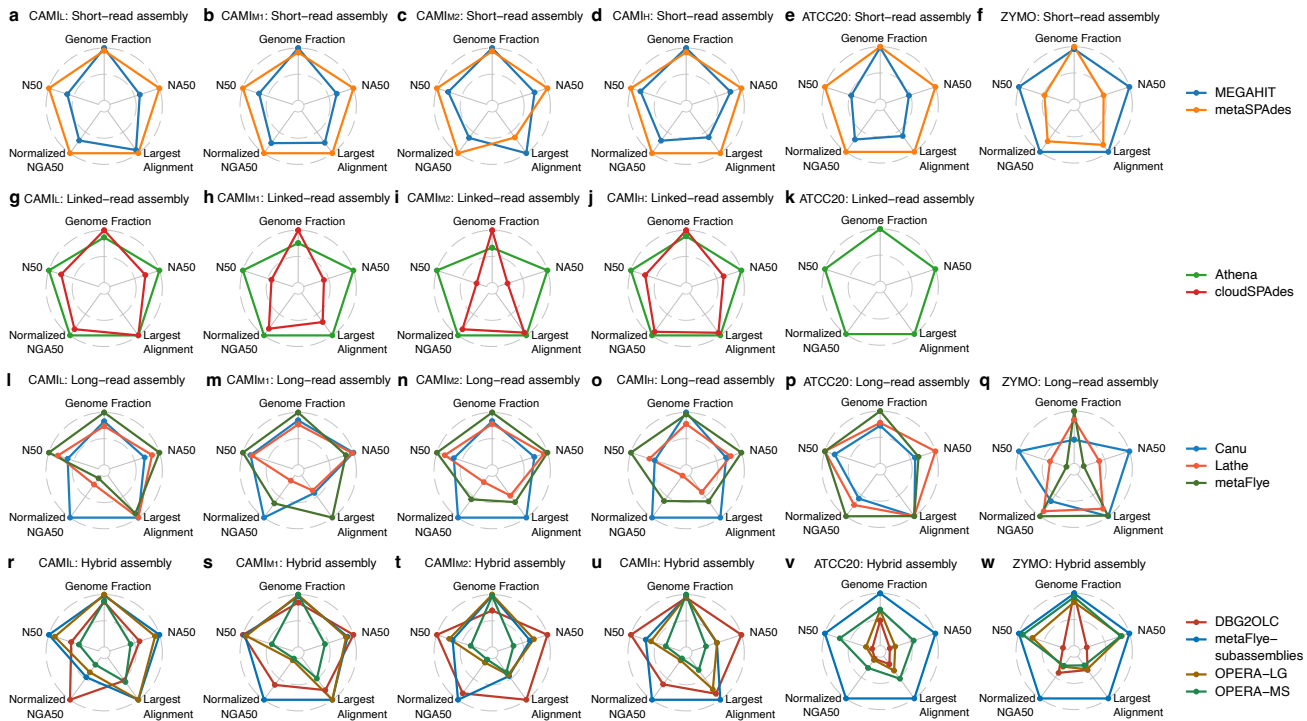

**Figure 2.** Contig statistics for the assemblies generated from the simulation and mock datasets (a-f for short-read assemblies; g-k for linked-read assemblies; l-q for long-read assemblies; r-w for hybrid assemblies). The long-reads used in q and w were sequenced by ONT GridION.

| Datasets   |                    | Sequencing Platforms | Sources                | Amount of sequencing (G) | Sequencing Depth (X) | Average Read Length (bp) | Community composition                               |
|------------|--------------------|----------------------|------------------------|--------------------------|----------------------|--------------------------|-----------------------------------------------------|
| Simulation | CAMI <sub>L</sub>  | Illumina HiSeq       | CAMI I                 | 15.0                     | 95                   | 150                      | 40 genomes and 20 circular elements <sup>37</sup>   |
|            |                    | 10x Chromium         | Simulation             | 15.0                     | 95                   | 150                      |                                                     |
|            |                    | ONT                  | Simulation             | 15.0                     | 95                   | 4,194                    |                                                     |
|            | CAMI <sub>M1</sub> | Illumina HiSeq       | CAMI I                 | 15.0                     | 26                   | 150                      | 132 genomes and 100 circular elements <sup>37</sup> |
|            |                    | 10x Chromium         | Simulation             | 15.0                     | 26                   | 150                      |                                                     |
|            |                    | ONT                  | Simulation             | 15.0                     | 26                   | 4,217                    |                                                     |
|            | CAMI <sub>M2</sub> | Illumina HiSeq       | CAMI I                 | 15.0                     | 26                   | 150                      | 132 genomes and 100 circular elements <sup>37</sup> |
|            |                    | 10x Chromium         | Simulation             | 15.0                     | 26                   | 150                      |                                                     |
|            |                    | ONT                  | Simulation             | 15.0                     | 26                   | 4,186                    |                                                     |
|            | CAMI <sub>H</sub>  | Illumina HiSeq       | CAMI I                 | 75.0                     | 27                   | 150                      | 596 genomes and 478 circular elements <sup>37</sup> |
|            |                    | 10x Chromium         | Simulation             | 75.0                     | 27                   | 150                      |                                                     |
|            |                    | ONT                  | Simulation             | 75.0                     | 27                   | 4,112                    |                                                     |
| Mock       | ATCC20             | Illumina HiSeq 2500  | SRR8359173             | 1.3                      | 19                   | 125                      | 20 strains <sup>40</sup>                            |
|            |                    | 10x Chromium         | SRR12283286            | 108.7                    | 1,622                | 150                      |                                                     |
|            |                    | PacBio CLR           | SRR12371719            | 253.5                    | 3,784                | 8,394                    |                                                     |
|            | ZYMO               | Illumina HiSeq 1500  | ERR2935805             | 9.7                      | 133                  | 101                      | 10 species <sup>41</sup>                            |
|            |                    | ONT GridION          | ERR3152366             | 16.5                     | 226                  | 4,501                    |                                                     |
| Real       | S1                 | Illumina HiSeq 2500  | This study             | 11.6                     | 29                   | 150                      | Human gut microbiome                                |
|            |                    | BGISEQ-500           | This study             | 16.8                     | 42                   | 100                      |                                                     |
|            |                    | 10x Chromium         | This study             | 58.7                     | 147                  | 150                      |                                                     |
|            |                    | PacBio CLR           | This study             | 6.3                      | 16                   | 8,878                    |                                                     |
|            | S2                 | Illumina HiSeq 2500  | This study             | 11.4                     | 34                   | 150                      | Human gut microbiome                                |
|            |                    | BGISEQ-500           | This study             | 15.0                     | 44                   | 100                      |                                                     |
|            |                    | 10x Chromium         | This study             | 56.1                     | 165                  | 150                      |                                                     |
|            |                    | PacBio CLR           | This study             | 8.4                      | 25                   | 8,973                    |                                                     |
|            | P1                 | Illumina HiSeq 4000  | SRR6788327, SRR6807561 | 76.6                     | 383                  | 150                      | Human gut microbiome                                |
|            |                    | 10x Chromium         | SRR6760786             | 35.8                     | 179                  | 150                      |                                                     |
|            |                    | ONT MinION           | SRR8427258             | 11.4                     | 57                   | 2,838                    |                                                     |
|            | P2                 | Illumina HiSeq 4000  | SRR6788328, SRR6807555 | 77.6                     | 776                  | 150                      | Human gut microbiome                                |
|            |                    | 10x Chromium         | SRR6760782             | 32.6                     | 326                  | 150                      |                                                     |
| ONT MinION |                    | SRR8427257           | 6.1                    | 61                       | 1,800                |                          |                                                     |

**Table 1.** The simulation, mock, and real datasets used to evaluate the performance of metagenome assembly tools. The PacBio CLR dataset of ATCC20 was downsampled to 50% to avoid out of memory issues.

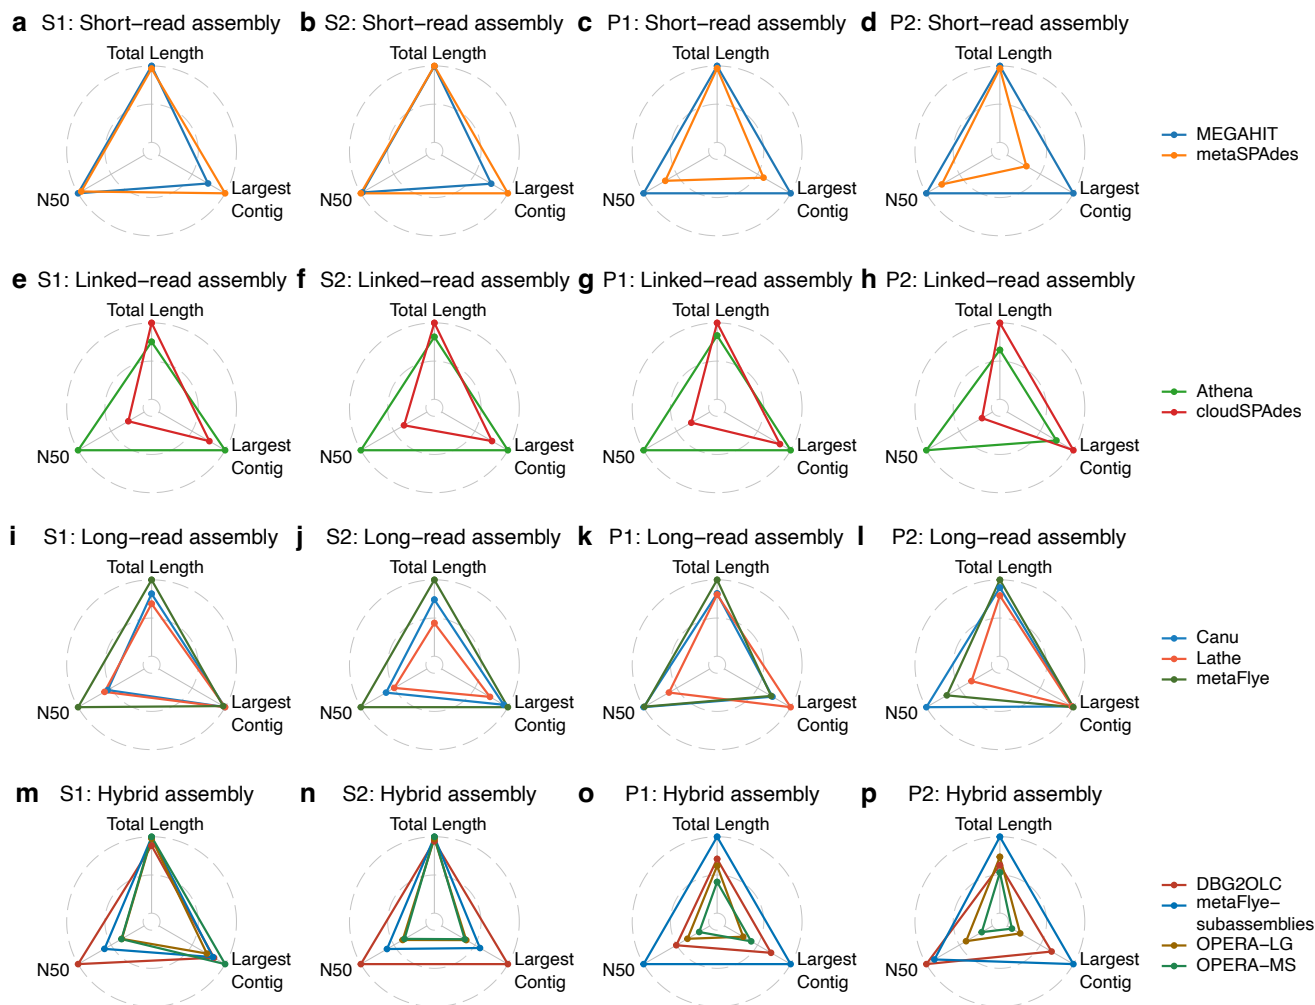

**Figure 3.** Contig statistics for the assemblies generated from real datasets (a-d for short-read assemblies; e-h for linked-read assemblies; i-l for long-read assemblies; m-p for hybrid assemblies). The short-reads used in a and b were generated by Illumina HiSeq 2500.

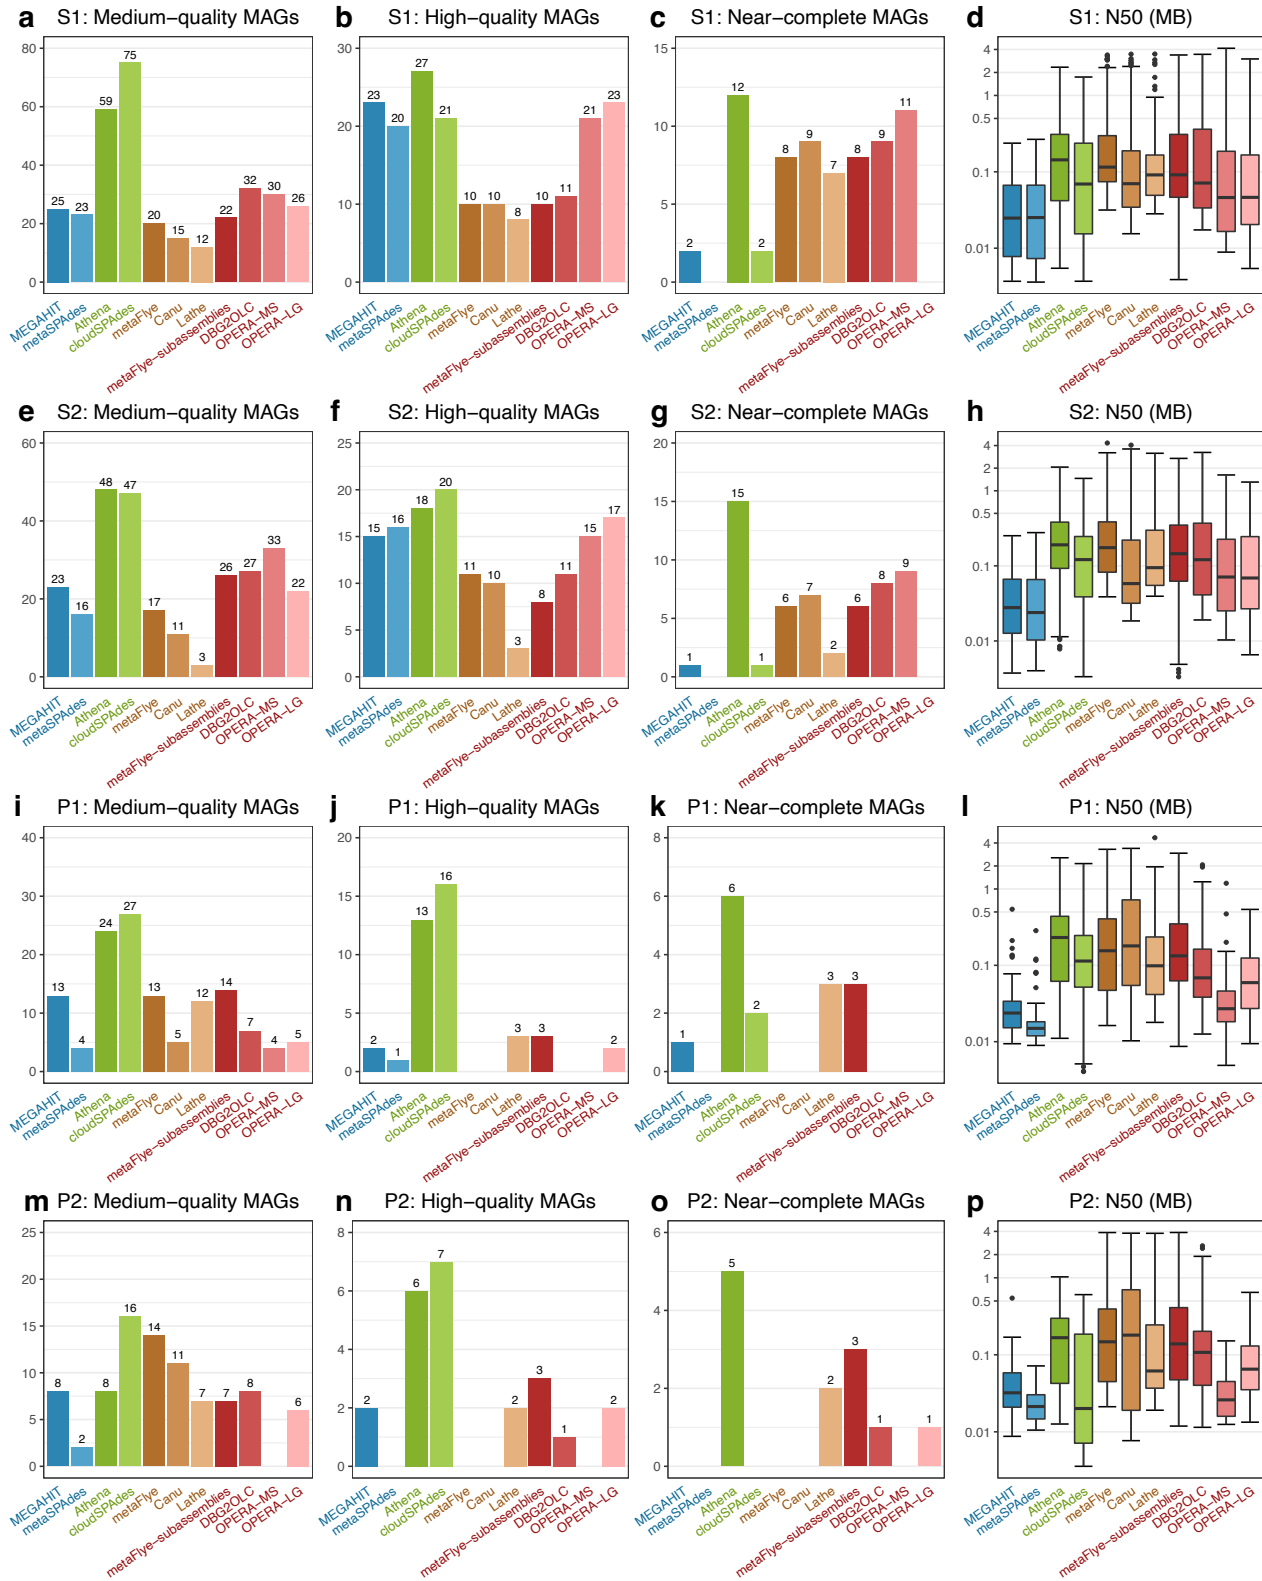

**Figure 4.** Numbers of medium-quality, high-quality, and near-complete metagenome-assembled genomes (MAGs) and the MAG N50 values for the assemblies generated from the real datasets (a-d for S1; e-h for S2; i-l for P1; m-p for P2). The short-reads used in a-d and e-h were generated by Illumina HiSeq 2500.



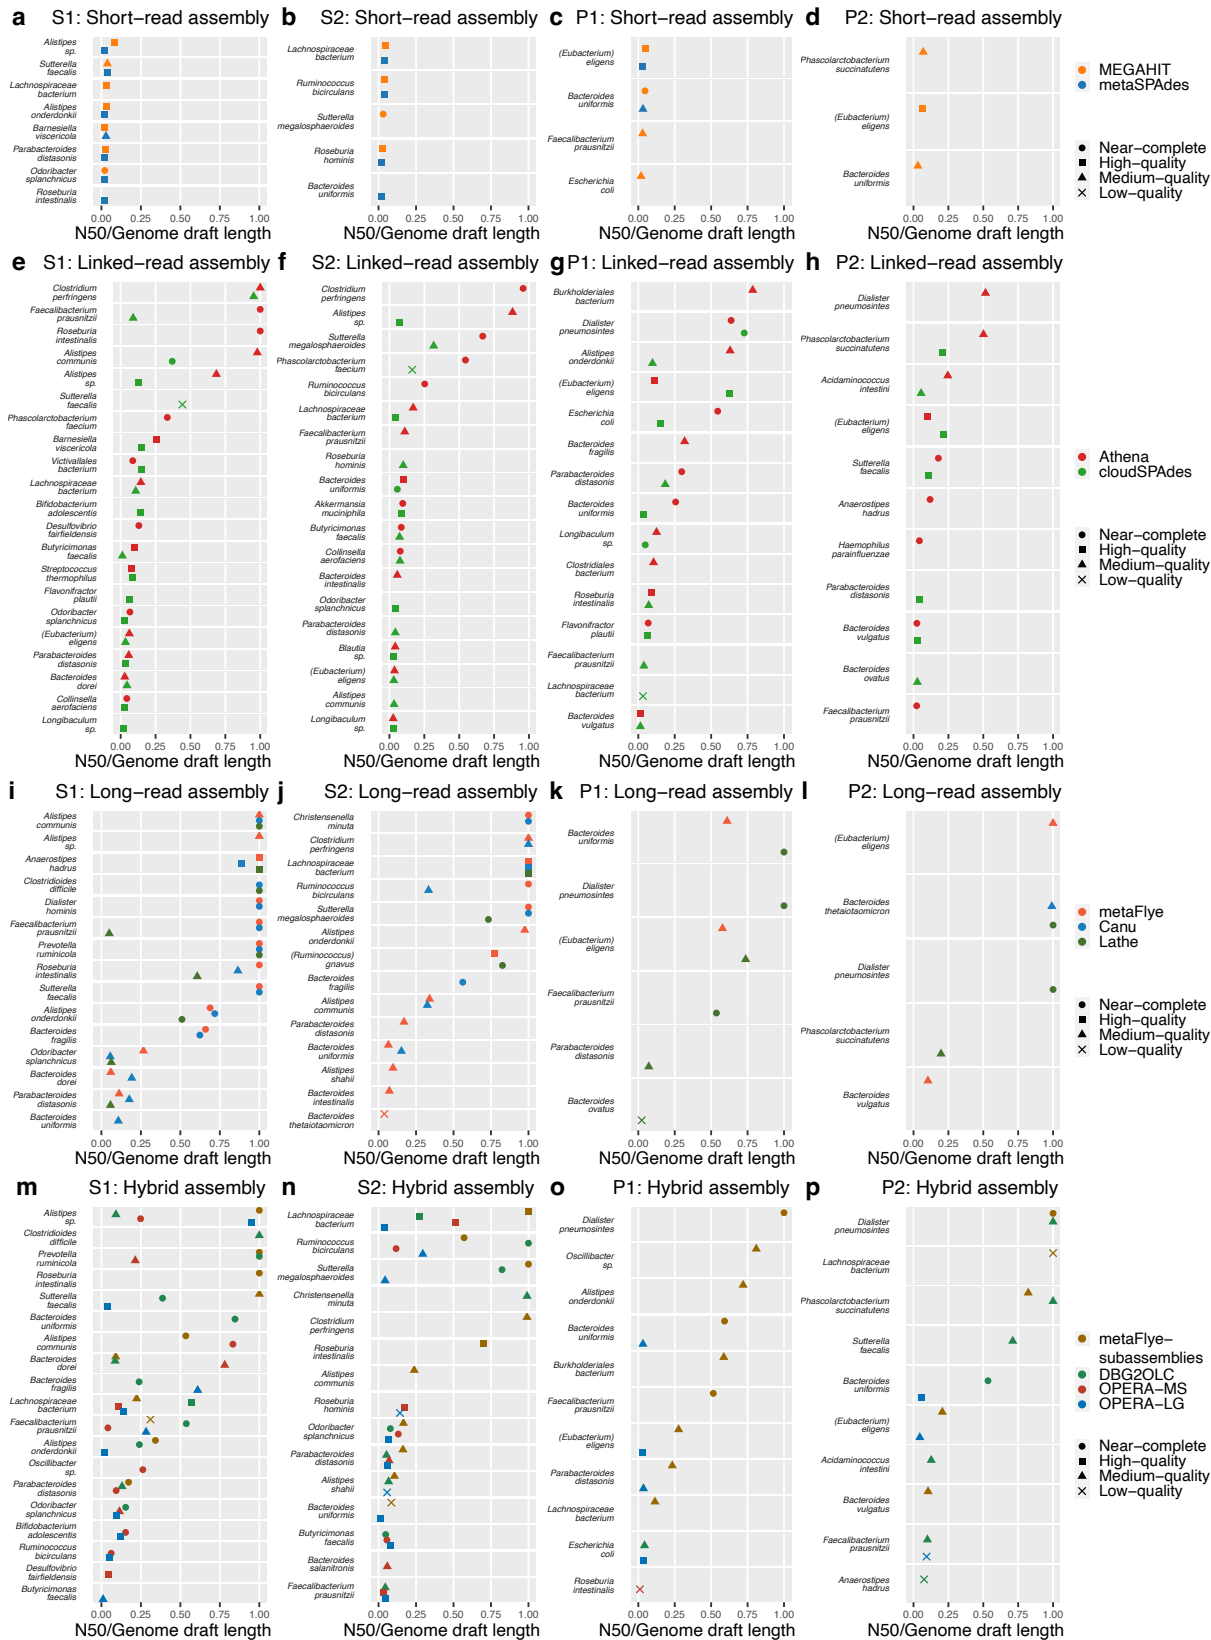

**Figure 5.** MAG annotations of the assemblies generated from the real datasets (a-d for short-read assemblies; e-h for linked-read assemblies; i-l for long-read assemblies; m-p for hybrid assemblies). The N50/genome draft length was used to evaluate the continuity of MAGs. The short-reads used in a and b were sequenced by Illumina HiSeq 2500.

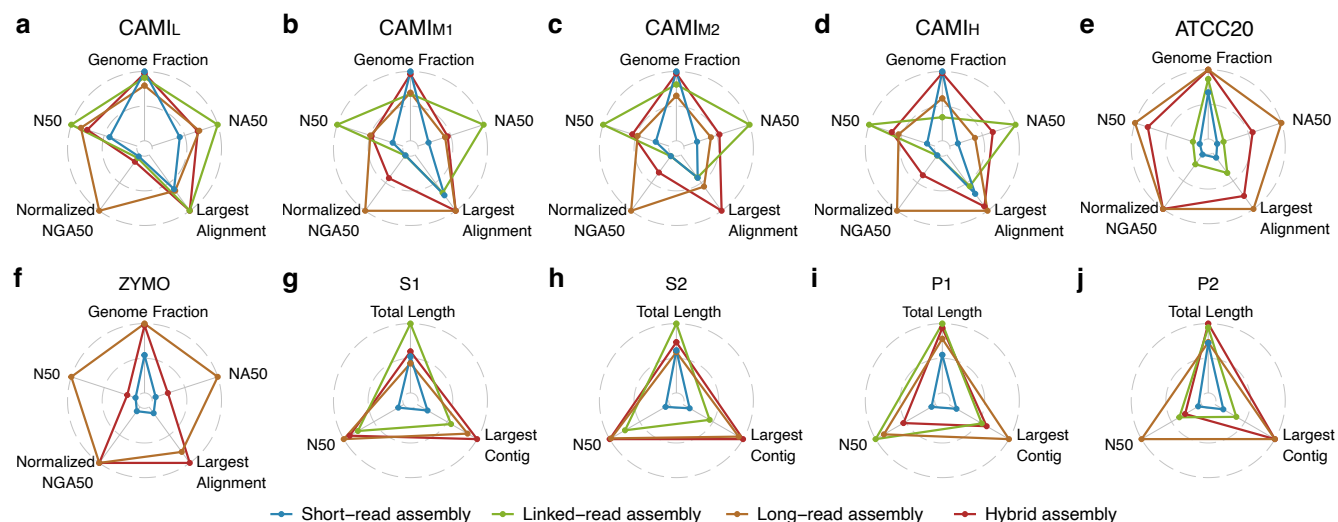

**Figure 6.** Contig statistics for the assemblies generated from simulation datasets (a-d); mock datasets (e-f); and real datasets (g-j).

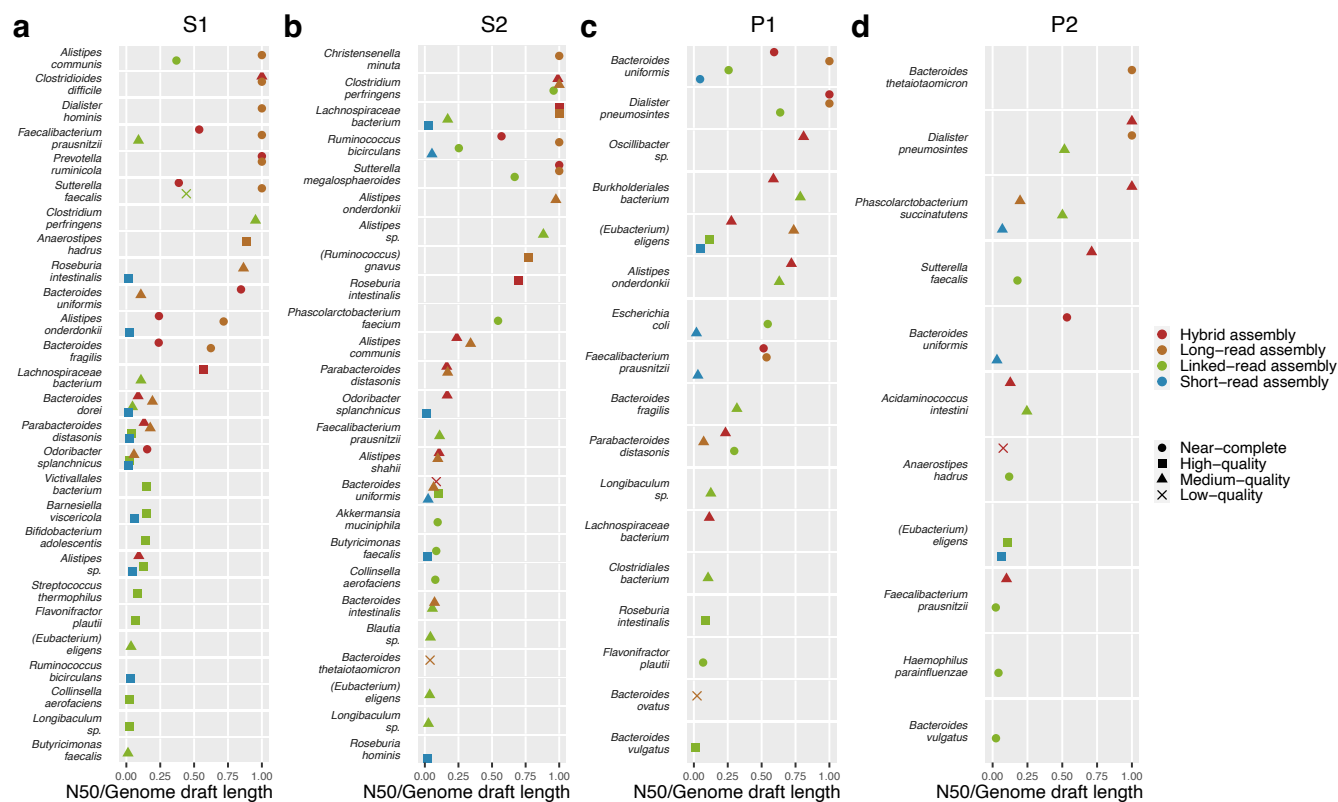

**Figure 7.** MAG annotations of the assemblies generated from real datasets with different sequencing strategies.

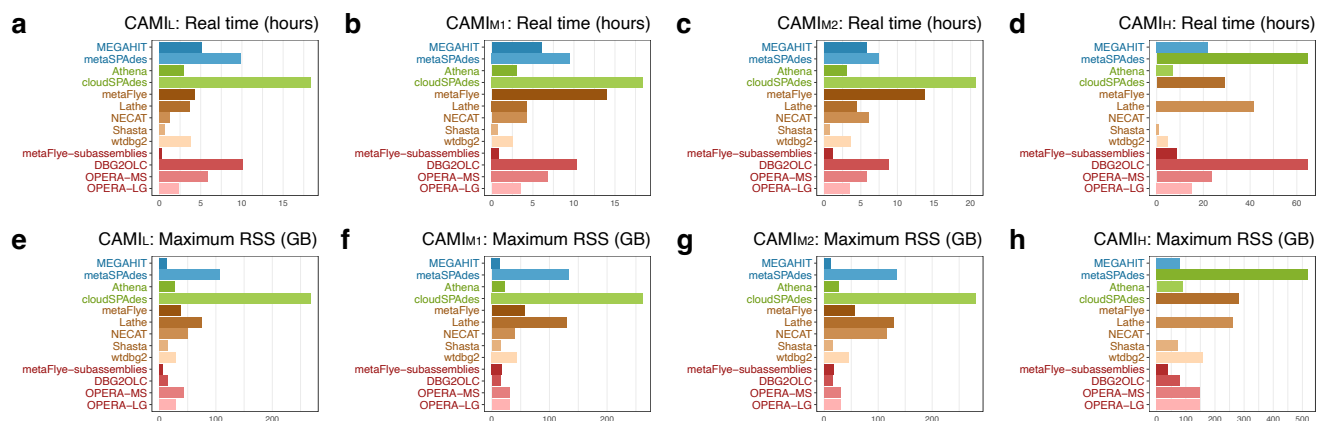

**Figure 8.** Computational resources (real time and resident set size [RSS]) consumed by the assembly tools in analyzing CAMI datasets. metaFlye and NECAT were not used for the analysis of CAMI<sub>H</sub> because it was found that they exceeded the maximum memory limitation.
